# Supplementary material
Source: PubMed Central journal article supplement (PMC1964861)
Supplement: pnas_0706793104_1.pdf [file pnas_0706793104_1.pdf]

**Table 3. Primers used for real time-PCR**

| <b>mRNA</b>    | <b>Primer Sequence 5' to 3'</b>                                | <b>mRNA</b> | <b>Primer Sequence 5' to 3'</b>                         |
|----------------|----------------------------------------------------------------|-------------|---------------------------------------------------------|
| $\beta$ -actin | GTACCACTGGCATCGTGATGGACT<br>CCGCTCATTTGCCAATGGTGAT             | COL5A2      | CAAGACACTTGCTCTAAGCGGAATG<br>CATTGTCGATGTGTCTTGGCTTACT  |
| VWF            | CTGGCAGCTGTTCTTATGTCCTATT<br>CTCATGCATGATGGCACCATAA            | COL3A1      | GAATTGTTGACTTGCATTCAGAACA<br>CAGCCCCATAATTTGGTTTTTATTG  |
| CD31           | AAATGCTCTCCCAGCCCAGGAT<br>GCAACACACTGGTATTTCGACGTCTT           | TIMP1       | GCCATGGAGAGTGTCTGCGGAT<br>TCACAGCCAACAGTGTAGGTCTTG      |
| SMA            | TTGACATCAGGAAGGACCTCTATGC<br>AGGCCCCGGCTTCATCGTATT             | CYR61       | GCATTCCATCCCTTCCTGAAGG<br>AGTTTAGAGTGCAGATAG            |
| KRT14          | SuperArray Bioscience (Frederick, MD)<br>Catalog no. PPH02389A | MMP1        | GTCAAGTTTGTGGCTTATGGATTCA<br>GGCAAAGACTCATGTCTCCTGTCT   |
| VIM            | GCCTGCAGGATGAGATTCAGAATA<br>AACCAGAGGGAGTGAATCCAGATTA          | ANGPT2      | GAGGAACTGTCTCGAACT<br>GTGGAAGAGGACACAGTG                |
| SULF1          | TATCCAATCAAGATGGCTAGAATGG<br>GGCATTGAAAAATTCCAGTGGTTAA         | SOX9        | AAACATGACCTATCCAAGCGCATT<br>TTAGCACACTGATCACACGATTCTC   |
| COL4A1         | CTCATTCTGCATCCTGGCTTGA<br>GCCCTGCTGAGGTCTGTGAACA               | KRT15       | SuperArray Bioscience<br>Catalog no. PPH02497A          |
| HLA-DRB4       | CTTGGGACAGGGCTGTTCATCT<br>GGTCATCTGCACTTCAGCTCAAGA             | CD24        | TTTACAACCTGCCTCGACACACATAA<br>CCCATGTAGTTTTCTAAAGATGGAA |
| THY1           | ACCCACCCCTCATCAGGAGTT<br>GCTTCCCTCTTCACGAACTCTCAA              | PROM1       | AACCTACAGCATATTCTTCA<br>AACGAACAGCATTCTCTCTCAAGA        |
